# Supplementary material for: A common DNA deletion altering the 3’UTR of mdr1 is associated with reduced mefloquine susceptibility in P. vivax parasites from Cambodian patients
Source: Research Square preprint supplement (doi:10.21203/rs.3.rs-6889263/v1), 2025-09-01
Supplement: Supplementary file 1 [file 634e2c3f802da0d60b92a784.xlsx]

## Sheet: Table S1
Sample	Total Reads	Mapped to Pv	%Mapped to Pv	Flagged for Deletion	Normal Region Coverage	Deletion Region Coverage	Proportion of Reads in Deleted Region	MDR1 Classification	DBP Duplication
2_D0	51584162	15197107	29.4608	TRUE	226	0	0	DEL	NA
2_D53_R2_D0	57339386	12798598	22.3208	TRUE	188	0	0	DEL	NA
2_D84_R3_D0	61215870	19577395	31.9809	TRUE	231	0	0	DEL	NA
5_D0	48314294	33660892	69.6707	TRUE	453	0	0	DEL	NA
5_D23_R1_D0	53767668	14614772	27.1813	TRUE	228	0	0	DEL	NA
5_D47_R2_D0	72258694	42263417	58.489	TRUE	623	0	0	DEL	NA
5_D71_R3_D0	67365138	35521683	52.7301	TRUE	487	0	0	DEL	NA
94_D19_R1_D0	74233572	49301597	66.4142	TRUE	664	0	0	DEL	NA
94_D47_R2_D0	46576414	15942447	34.2286	TRUE	199	0	0	DEL	NA
138_D0	67838042	51869438	76.4607	TRUE	671	0	0	DEL	NA
115_D0	57696490	35893316	62.2106	TRUE	512	0	0	DEL	NA
97_D20_R1_D0	70385502	56393462	80.1208	TRUE	835	0	0	DEL	NA
97_D46_R2_D0	50895442	5384027	10.5786	TRUE	84	0	0	DEL	NA
116_D0	85043560	68045762	80.0128	TRUE	1007	0	0	DEL	NA
98_D0	67041114	52937251	78.9624	TRUE	716	0	0	DEL	NA
117_D42_R1_D0	59393050	26531728	44.6714	TRUE	363	0	0	DEL	NA
100_D0	57721058	24957860	43.2387	TRUE	311	0	0	DEL	NA
101_D0	58565980	13053126	22.2879	TRUE	214	0	0	DEL	NA
101_D44_R1_D0	58653546	4953935	8.4461	TRUE	81	0	0	DEL	NA
103_D0	52277044	14625360	27.9766	TRUE	179	0	0	DEL	NA
104_D0	54880288	32709143	59.6009	TRUE	411	15	0.0364964	DEL	NA
104_D22_R1_D0	56266790	20899453	37.1435	TRUE	306	0	0	DEL	NA
163_D0	132772254	109154656	82.2119	TRUE	1449	0	0	DEL	NA
106_D0	67518862	46881492	69.4347	TRUE	630	0	0	DEL	NA
107_D0	66107896	53076730	80.288	TRUE	714	0	0	DEL	DUPL
120_D0	53238532	30400478	57.1024	TRUE	421	0	0	DEL	NA
108_D0	61271298	34770575	56.7486	TRUE	463	0	0	DEL	NA
121_D0	60941632	30496540	50.0422	TRUE	386	0	0	DEL	NA
144_D0	74624420	45658554	61.1845	TRUE	742	0	0	DEL	NA
86_D0	62040180	33234459	53.5692	TRUE	513	21	0.0409357	DEL	NA
25_D0	46545346	41683995	89.5557	TRUE	566	0	0	DEL	NA
25_D47_R1_D0	70922684	59074266	83.2939	TRUE	833	0	0	DEL	NA
87_D0	63494352	47930467	75.4878	TRUE	741	0	0	DEL	NA
6_D15_R1_D0	61546976	42621145	69.2498	TRUE	661	24	0.0363086	DEL	NA
6_D35_R2_D0	63675948	38635873	60.6758	TRUE	605	4	0.00661157	DEL	NA
6_D53_R3_D0	61176594	22166810	36.2341	TRUE	327	0	0	DEL	NA
43_D0	55990786	28138347	50.2553	TRUE	388	0	0	DEL	DUPL
7_D0	49151470	45105652	91.7687	TRUE	867	0	0	DEL	NA
7_D20_R1_D0	48625166	4972894	10.227	TRUE	69	2	0.0289855	DEL	NA
7_D41_R2_D0	58549586	16119100	27.5307	TRUE	247	0	0	DEL	NA
7_D64_R3_D0	76655392	55540517	72.4548	TRUE	813	0	0	DEL	NA
39_D0	88521582	74338311	83.9776	TRUE	951	47	0.0494217	DEL	NA
1_D0	67907702	63056680	92.8564	TRUE	1209	0	0	DEL	NA
1_D19_R1_D0	58555598	12058995	20.5941	TRUE	181	1	0.00552486	DEL	NA
1_D50_R3_D0	56418134	12281156	21.7681	TRUE	302	0	0	DEL	NA
3_D0	43161366	39809521	92.2342	TRUE	656	0	0	DEL	NA
3_D19_R2_D0	59908496	20830794	34.771	TRUE	314	0	0	DEL	NA
3_D62_R3_D0	72953752	28654765	39.278	TRUE	435	0	0	DEL	NA
45_D0	65735556	58668728	89.2496	TRUE	820	0	0	DEL	NA
15_D0	60995868	22238347	36.4588	TRUE	304	0	0	DEL	NA
15_D0	49480572	44312100	89.5545	TRUE	630	0	0	DEL	NA
15_D24_R1_D0	68538894	48192919	70.3147	TRUE	678	0	0	DEL	NA
47_D0	59194164	31930153	53.9414	TRUE	474	0	0	DEL	NA
48_D0	58993736	35250737	59.7534	TRUE	501	0	0	DEL	NA
28_D0	51623074	47150710	91.3365	TRUE	656	0	0	DEL	NA
28_D44_R1_D0	51481674	23482523	45.6134	TRUE	357	0	0	DEL	NA
49_D0	44053740	38614869	87.654	TRUE	519	0	0	DEL	NA
40_D0	65289980	50385342	77.1716	TRUE	657	0	0	DEL	NA
26_D0	58932476	8714824	14.7878	TRUE	98	0	0	DEL	DUPL
26_D31_R1_D0	46343692	36732309	79.2606	TRUE	476	0	0	DEL	DUPL
8_D23_R1_D0	53384578	32117226	60.162	TRUE	441	0	0	DEL	DUPL
8_D49_R2_D0	45797406	7749138	16.9205	TRUE	93	4	0.0430108	DEL	DUPL
8_D77_R3_D0	61846418	11378357	18.3978	TRUE	136	0	0	DEL	NA
50_D0	64264912	46346864	72.1185	TRUE	696	0	0	DEL	NA
51_D0	56365530	51883843	92.0489	TRUE	703	0	0	DEL	NA
52_D0	53049726	43518196	82.0328	TRUE	570	0	0	DEL	NA
16_D0	49862746	45663813	91.579	TRUE	534	0	0	DEL	NA
16_D28_R1_D0	49785484	9870632	19.8263	TRUE	183	0	0	DEL	NA
16_D57_R2_D0	40424170	24966735	61.7619	TRUE	323	2	0.00619195	DEL	NA
9_D0	46588170	42192316	90.5644	TRUE	515	0	0	DEL	NA
9_D23_R1_D0	86782952	62287462	71.7738	TRUE	930	0	0	DEL	NA
9_D48_R2_D0	61428180	57052622	92.877	TRUE	874	0	0	DEL	NA
9_D77_R3_D0	63047604	33788135	53.5915	TRUE	436	0	0	DEL	NA
17_D0	61831208	54108100	87.5094	TRUE	717	0	0	DEL	NA
17_D38_R1_D0	65306978	20966085	32.1039	TRUE	264	0	0	DEL	NA
17_D84_R2_D0	63855744	9021576	14.1281	TRUE	118	0	0	DEL	NA
54_D0	46287874	40160363	86.7622	TRUE	600	0	0	DEL	NA
57_D0	63488402	27378441	43.1235	TRUE	461	0	0	DEL	NA
58_D0	62739410	44259382	70.5448	TRUE	618	0	0	DEL	NA
58_D88_R1_D0	56268778	9274013	16.4816	TRUE	154	0	0	DEL	NA
10_D0	64504176	40456362	62.719	TRUE	528	0	0	DEL	NA
10_D82_R3_D0	62124262	28899377	46.5187	TRUE	529	0	0	DEL	NA
18_D0	73777024	61123739	82.8493	TRUE	828	0	0	DEL	NA
18_D36_R1_D0	46710634	38676861	82.801	TRUE	535	0	0	DEL	NA
18_D64_R2_D0	43200062	9556294	22.121	TRUE	124	0	0	DEL	NA
59_D0	55138950	37613930	68.2166	TRUE	494	0	0	DEL	DUPL
60_D0	61468416	45118383	73.4009	TRUE	646	8	0.0123839	DEL	DUPL
61_D0	78222774	61263268	78.319	TRUE	1601	0	0	DEL	NA
41_D0	108758798	93348651	85.8309	TRUE	1157	0	0	DEL	NA
62_D0	72040594	58063041	80.5977	TRUE	766	0	0	DEL	NA
63_D0	60611380	17546730	28.9496	TRUE	227	0	0	DEL	NA
65_D0	59780244	42316344	70.7865	TRUE	609	0	0	DEL	NA
67_D0	52674428	20846382	39.5759	TRUE	361	0	0	DEL	NA
36_D0	111555156	96103936	86.1493	TRUE	1240	0	0	DEL	NA
19_D0	78129744	61609014	78.8547	TRUE	813	0	0	DEL	NA
68_D0	61432642	36553447	59.5017	TRUE	559	0	0	DEL	NA
68_D0	62700040	55033007	87.7719	TRUE	818	0	0	DEL	NA
69_D0	42934330	38564708	89.8225	TRUE	480	3	0.00625	DEL	NA
42_D0	99736712	82553665	82.7716	TRUE	1090	0	0	DEL	NA
70_D0	52291226	29034767	55.5251	TRUE	427	0	0	DEL	NA
11_D24_R1_D0	48657824	28409714	58.3867	TRUE	360	11	0.0305556	DEL	NA
11_D46_R2_D0	42470302	30905994	72.7708	TRUE	475	0	0	DEL	NA
11_D67_R3_D0	77038376	26829707	34.8264	TRUE	356	14	0.0393258	DEL	NA
12_D0	56965158	45371951	79.6486	TRUE	651	0	0	DEL	DUPL
12_D28_R1_D0	37304924	28040565	75.1659	TRUE	349	0	0	DEL	DUPL
12_D59_R2_D0	60741836	22930618	37.7509	TRUE	290	0	0	DEL	DUPL
71_D0	71013670	27005841	38.0291	TRUE	402	0	0	DEL	NA
20_D0	73106838	48489193	66.3265	TRUE	663	0	0	DEL	DUPL
20_D64_R2_D0	65649562	37351600	56.8954	TRUE	582	0	0	DEL	NA
38_D0	61279944	26599382	43.4063	TRUE	357	0	0	DEL	NA
14_D0	72986238	56795865	77.8172	TRUE	768	0	0	DEL	NA
14_D22_R1_D0	57782948	12680288	21.9447	TRUE	187	0	0	DEL	NA
14_D82_R2_D0	78511044	64777778	82.5079	TRUE	872	0	0	DEL	NA
13_D0	47819494	33152660	69.3288	TRUE	409	0	0	DEL	NA
30_D0	61207904	46898750	76.622	TRUE	605	0	0	DEL	NA
30_D72_R1_D0	68436698	50742752	74.1455	TRUE	685	0	0	DEL	NA
32_D0	55788238	32259345	57.8246	TRUE	483	0	0	DEL	NA
32_D72_R1_D0	58392298	31803767	54.4657	TRUE	420	0	0	DEL	NA
21_D0	40267714	31243977	77.5906	TRUE	376	0	0	DEL	NA
22_D0	51406008	46308431	90.0837	TRUE	611	0	0	DEL	NA
22_D57_R2_D0	37903958	31671924	83.5584	TRUE	441	0	0	DEL	NA
23_D0	56424246	34772025	61.626	TRUE	516	0	0	DEL	DUPL
23_D52_R1_D0	54235214	19620462	36.1766	TRUE	232	0	0	DEL	DUPL
23_D83_R2_D0	59714176	55238564	92.5049	TRUE	712	0	0	DEL	DUPL
74_D0	57159000	44403841	77.6848	TRUE	594	0	0	DEL	NA
33_D0	61014678	55766206	91.398	TRUE	786	0	0	DEL	NA
33_D74_R1_D0	59815598	21557904	36.0406	TRUE	264	0	0	DEL	NA
34_D0	64091524	41476122	64.7139	TRUE	586	18	0.0307167	DEL	NA
34_D38_R1_D0	49345940	44664280	90.5126	TRUE	627	0	0	DEL	NA
78_D0	56794946	19358395	34.0847	TRUE	259	0	0	DEL	NA
24_D25_R1_D0	76669994	61193862	79.8146	TRUE	909	0	0	DEL	NA
24_D46_R2_D0	48248088	35374789	73.3185	TRUE	518	0	0	DEL	NA
79_D0	53623340	32513780	60.6336	TRUE	426	0	0	DEL	NA
81_D0	60673584	43699753	72.0243	TRUE	653	0	0	DEL	NA
35_D0	56878822	27444919	48.2516	TRUE	406	0	0	DEL	NA
35_D70_R1_D0	48950482	27781824	56.755	TRUE	446	0	0	DEL	NA
83_D0	61770862	36772860	59.5311	TRUE	525	0	0	DEL	NA
88_D0	99831774	82891209	83.0309	TRUE	1160	0	0	DEL	NA
88_D26_R1_D0	57429936	40673319	70.8225	TRUE	562	0	0	DEL	NA
88_D40_R2_D0	56243632	38205058	67.9278	TRUE	860	0	0	DEL	NA
88_D73_R3_D0	52833128	34282639	64.8885	TRUE	458	0	0	DEL	NA
90_D0	70063334	50908421	72.6606	TRUE	777	0	0	DEL	DUPL
114_D0	54953042	39687998	72.2217	TRUE	581	0	0	DEL	NA
91_D79_R3_D0	53156704	30624481	57.6117	TRUE	457	1	0.00218818	DEL	NA
27_D0	67240082	58953585	87.6763	TRUE	768	0	0	DEL	NA
92_D0	121648632	104977644	86.2958	TRUE	1325	0	0	DEL	NA
94_D0	70155084	57706475	82.2556	TRUE	845	104	0.123077	MIX	NA
97_D0	79884806	61075416	76.4544	TRUE	806	47	0.0583127	MIX	NA
102_D0	79748362	61409934	77.0046	TRUE	829	243	0.293124	MIX	NA
143_D0	79213954	66058336	83.3923	TRUE	900	246	0.273333	MIX	NA
109_D0	61532722	50359847	81.8424	TRUE	746	86	0.115282	MIX	DUPL
6_D0	110329546	94182569	85.3648	TRUE	1188	186	0.156566	MIX	NA
8_D0	89113130	74443706	83.5384	TRUE	990	357	0.360606	MIX	NA
66_D0	99120264	83210813	83.9493	TRUE	1072	842	0.785448	MIX	NA
11_D0	59521648	47322141	79.5041	TRUE	697	127	0.182209	MIX	NA
37_D0	62018228	46969337	75.7347	TRUE	627	311	0.496013	MIX	NA
4_D51_R2_D0	62869052	36223417	57.6172	TRUE	942	477	0.506369	MIX	NA
4_D76_R3_D0	68188718	44653407	65.485	TRUE	1024	658	0.642578	MIX	NA
72_D0	53683938	31675439	59.0036	TRUE	464	359	0.773707	MIX	NA
13_D31_R1_D0	67643386	25581937	37.8188	TRUE	308	164	0.532468	MIX	DUPL
31_D0	60969758	36605861	60.0394	TRUE	548	364	0.664234	MIX	NA
73_D0	51092058	47221595	92.4245	TRUE	678	58	0.0855457	MIX	NA
21_D78_R2_D0	59754482	39705925	66.4484	TRUE	525	118	0.224762	MIX	NA
90_D28_R1_D0	60325966	45000695	74.5959	TRUE	618	109	0.176375	MIX	DUPL
90_D54_R2_D0	56068930	40608570	72.4262	TRUE	518	397	0.766409	MIX	DUPL
95_D0	55864058	34527501	61.8063	TRUE	494	456	0.923077	MIX	NA
91_D0	76735804	63357222	82.5654	TRUE	824	706	0.856796	MIX	NA
117_D0	55743096	40858890	73.2986	TRUE	554	467	0.84296	MIX	DUPL
162_D0	38027330	34780365	91.4615	TRUE	970	435	0.448454	MIX	NA
2_D27_R1_D0	54775208	13315265	24.3089	FALSE	167	0	0	NODEL	NA
95_D40_R1_D0	46919626	16842319	35.8961	FALSE	215	209	0.972093	NODEL	NA
139_D0	55674890	41967742	75.38	FALSE	627	584	0.931419	NODEL	NA
97_D69_R3_D0	58887870	6338098	10.763	FALSE	67	0	0	NODEL	NA
140_D0	80087960	65279853	81.5102	FALSE	959	806	0.840459	NODEL	NA
84_D0	70663304	39123313	55.3658	FALSE	507	455	0.897436	NODEL	NA
99_D0	95961672	82072743	85.5266	FALSE	1039	873	0.840231	NODEL	DUPL
119_D0	98057048	63981196	65.249	FALSE	970	867	0.893814	NODEL	DUPL
85_D0	87477742	73843299	84.4138	FALSE	983	909	0.92472	NODEL	NA
44_D0	60821378	12657504	20.8109	FALSE	178	0	0	NODEL	NA
3_D42_R2_D0	54686940	11771989	21.5261	FALSE	164	2	0.0121951	NODEL	NA
46_D0	53774272	44614101	82.9655	FALSE	599	543	0.906511	NODEL	NA
53_D0	89059732	74113860	83.2181	FALSE	944	907	0.960805	NODEL	NA
161_D0	53092546	45501597	85.7024	FALSE	684	651	0.951754	NODEL	NA
55_D0	81158182	65904577	81.2051	FALSE	891	843	0.946128	NODEL	NA
56_D0	55255966	12458327	22.5466	FALSE	184	183	0.994565	NODEL	NA
64_D0	72545786	51099135	70.4371	FALSE	769	728	0.946684	NODEL	NA
19_D83_R2_D0	53939490	3743510	6.9402	FALSE	33	0	0	NODEL	NA
4_D22_R1_D0	61935218	3799281	6.13428	FALSE	41	61	1.4878	NODEL	NA
12_D83_R2_D0	57102314	7293062	12.7719	FALSE	116	0	0	NODEL	DUPL
20_D24_R1_D0	66107366	41636342	62.9829	FALSE	642	593	0.923676	NODEL	NA
29_D0	53160104	24879180	46.8005	FALSE	388	359	0.925258	NODEL	NA
13_D52_R2_D0	65650916	30735360	46.8163	FALSE	481	412	0.856549	NODEL	NA
13_D77_R3_D0	62093420	39840424	64.1621	FALSE	545	534	0.979817	NODEL	NA
31_D50_R1_D0	59555036	23995706	40.2916	FALSE	324	394	1.21605	NODEL	NA
75_D0	73158772	17094644	23.3665	FALSE	254	304	1.19685	NODEL	NA
76_D0	63331984	41008759	64.7521	FALSE	595	560	0.941176	NODEL	DUPL
77_D0	66762600	35871727	53.7303	FALSE	449	507	1.12918	NODEL	DUPL
80_D0	70315828	51927813	73.8494	FALSE	719	723	1.00556	NODEL	DUPL
82_D0	84872296	71171598	83.8573	FALSE	993	840	0.845921	NODEL	NA
89_D0	66061534	45255573	68.5052	FALSE	626	586	0.936102	NODEL	NA
89_D60_R1_D0	51374188	32233665	62.7429	FALSE	416	439	1.05529	NODEL	NA
90_D82_R3_D0	51426730	37502414	72.924	FALSE	507	529	1.04339	NODEL	DUPL
137_D0	48903592	25374978	51.8878	FALSE	340	343	1.00882	NODEL	DUPL
91_D51_R2_D0	78167108	60230028	77.0529	FALSE	817	696	0.851897	NODEL	DUPL
93_D0	55135112	43173349	78.3046	FALSE	538	529	0.983271	NODEL	NA
93_D51_R1_D0	59394996	40221231	67.7182	FALSE	600	585	0.975	NODEL	NA
95_D73_R2_D0	57559816	537534	0.93387	low coverage	4	0	0	low coverage	NA
96_D0	52468558	216946	0.413478	low coverage	2	0	0	low coverage	NA
96_D81_R1_D0	64531120	1816505	2.81493	low coverage	21	0	0	low coverage	NA
141_D0	57715620	759315	1.31561	low coverage	3	0	0	low coverage	NA
117_D76_R2_D0	52141646	252649	0.484544	low coverage	2	0	0	low coverage	NA
118_D0	46878720	25073	0.0534848	low coverage	0	0	0	low coverage	NA
103_D31_R1_D0	55364090	725621	1.31063	low coverage	18	0	0	low coverage	NA
105_D0	55521592	1260010	2.26941	low coverage	15	9	0.6	low coverage	NA
145_D0	53650788	1218216	2.27064	low coverage	10	0	0	low coverage	NA
1_D80_R4_D0	50323804	2360911	4.69144	low coverage	22	0	0	low coverage	NA
164_D0	58444188	18844	0.0322427	low coverage	0	0	0	low coverage	NA
10_D26_R1_D0	50070578	59561	0.118954	low coverage	0	0	0	low coverage	NA
10_D51_R2_D0	55646250	1790165	3.21705	low coverage	11	0	0	low coverage	NA
19_D32_R1_D0	62311396	409924	0.657864	low coverage	4	0	0	low coverage	NA
4_D0	53157130	49589	0.0932876	low coverage	0	0	0	low coverage	NA
29_D42_R1_D0	50668102	822870	1.62404	low coverage	7	0	0	low coverage	NA
21_D38_R1_D0	37820608	54441	0.143945	low coverage	0	0	0	low coverage	NA
22_D30_R1_D0	55833774	2445968	4.3808	low coverage	55	0	0	low coverage	NA
36_D52_R1_D0	54008558	1787110	3.30894	low coverage	31	0	0	low coverage	NA
91_D26_R1_D0	48571484	3186629	6.5607	low coverage	35	0	0	low coverage	NA
142_D0	54626986	1918258	3.51156	low coverage	39	0	0	low coverage	NA
1_D31_R2_D0	68910098	1264854	1.83551	low coverage	30	0	0	low coverage	NA
94_D73_R3_D0	47927074	2447563	5.10685	low coverage	34	6	0.176471	low coverage	NA
27_D84_R1_D0	56970308	2290653	4.02078	low coverage	27	0	0	low coverage	NA

## Sheet: Table S3
Sample	Total number of read pairs	Pv mapped read pairs count	Pv unique read pair count	Pv unique read pairs mapped to genes	Classification (by DNA)
PQRC21_068_D0	70243516	43862773	24555972	22742008	DEL
PQRC21_036_D0	71312395	43858332	24485793	22693532	DEL
PQRC21_098_D0	73874026	33217841	18865257	17622674	DEL
PQRC21_016_D0	65267378	31638297	18538438	17233158	DEL
PQRC21_050_D0	67213866	27552960	16745409	15801188	DEL
PQRC21_020_D0	79070878	30647853	16356684	15230482	DEL
PQRC21_051_D0	76669739	28051966	15789842	14723619	DEL
PQRC21_018_D0	86481899	28463676	14655332	13563182	DEL
PQRC21_116_D0	63462014	29115525	14541613	13452436	DEL
PQRC21_026_D0	64983781	23340333	13359274	12537476	DEL
PQRC21_040_D0	68229735	18369438	11993097	11210896	DEL
PQRC21_079_D0	66588433	20972689	11859819	11109990	DEL
PQRC21_023_D0	61100341	22477783	11790514	11094777	DEL
PQRC21_033_D0	79702638	21851366	11731448	11041816	DEL
PQRC21_081_D0	59592198	18804039	11626835	10762981	DEL
PQRC21_038_D0	66995776	18934833	11372623	10640631	DEL
PQRC21_059_D0	63006443	18460171	11336115	10654074	DEL
PQRC21_060_D0	76315947	19077909	10920998	10251355	DEL
PQRC21_138_D0	61062678	20419931	10309550	9721564	DEL
PQRC21_009_D0	66279367	17170488	10151014	9503705	DEL
PQRC21_027_D0	54301834	15312290	9807752	9241442	DEL
PQRC21_052_D0	56066506	14690824	9214288	8665253	DEL
PQRC21_030_D0	70511996	16022580	9153237	8504914	DEL
PQRC21_042_D0	63742201	14030650	8999593	8389807	DEL
PQRC21_083_D0	62229211	17035420	8816436	8279552	DEL
PQRC21_067_D0	62901071	13407593	7993946	7530767	DEL
PQRC21_035_D0	67452131	15932496	7819499	7329784	DEL
PQRC21_114_D0	65048042	15953156	7813035	7338997	DEL
PQRC21_022_D0	62595825	18189132	7773130	7180780	DEL
PQRC21_061_D0	58090832	16575596	7605603	7074657	DEL
PQRC21_074_D0	98447733	20670725	7356046	6902006	DEL
PQRC21_054_D0	74067718	14027738	7141064	6721666	DEL
PQRC21_058_D0	65647388	13303970	7125419	6716710	DEL
PQRC21_057_D0	64802400	13112091	7049605	6635681	DEL
PQRC21_071_D0	71223309	10783452	6581424	6189376	DEL
PQRC21_144_D0	63807009	17579370	6404677	5973081	DEL
PQRC21_028_D0	51468096	11302988	6038535	5574951	DEL
PQRC21_034_D0	59622403	11701880	6037009	5651896	DEL
PQRC21_019_D0	67308450	9050923	5578166	5199728	DEL
PQRC21_104_D0	67635164	13326208	5279733	4878145	DEL
PQRC21_032_D0	69922422	8703656	5156866	4866660	DEL
PQRC21_100_D0	44827373	7103210	5040954	4728042	DEL
PQRC21_108_D0	77981908	15245095	4938134	4567096	DEL
PQRC21_115_D0	76232343	8982950	4680239	4422718	DEL
PQRC21_010_D0	60227052	6614843	4288721	4032078	DEL
PQRC21_090_D0	69836431	8636516	4256484	3941998	DEL
PQRC21_012_D0	69402051	6461744	3430214	3177130	DEL
PQRC21_021_D0	64240243	5244734	3331807	3138376	DEL
PQRC21_088_D0	42234659	8676178	3232667	2993596	DEL
PQRC21_121_D0	81354766	9151538	3145881	2922853	DEL
PQRC21_002_D0	92931315	5301665	3097627	2904966	DEL
PQRC21_13_0D0	75663944	5242100	3024023	2850181	DEL
PQRC21_069_D0	77642479	4808838	2850630	2664576	DEL
PQRC21_049_D0	60959850	3726129	2465125	2307314	DEL
PQRC21_043_D0	66171990	3521714	2001079	1873549	DEL
PQRC21_070_D0	51774128	3175686	1894148	1781101	DEL
PQRC21_063_D0	54863887	2866252	1828393	1724118	DEL
PQRC21_106_D0	72112634	5103791	1725573	1582543	DEL
PQRC21_103_D0	56881067	2990927	1632214	1520734	DEL
PQRC21_065_D0	61443798	1636344	939155	880779	DEL
PQRC21_078_D0	75350861	1145774	626150	586195	DEL
PQRC21_037_D0	78218297	42531481	22735772	21290093	MIXED
PQRC21_073_D0	68370973	31865289	18499607	17130058	MIXED
PQRC21_006_D0	65188897	29461896	17358894	16181047	MIXED
PQRC21_097_D0	87776994	29455421	16534088	15531805	MIXED
PQRC21_031_D0	65668520	27063156	16446060	15435946	MIXED
PQRC21_117_D0	69872454	23067586	13652280	12805498	MIXED
PQRC21_008_D0	68619159	24390637	13436260	12639592	MIXED
PQRC21_011_D0	61569534	19961977	12027967	11247437	MIXED
PQRC21_066_D0	74458450	20767362	11409246	10239951	MIXED
PQRC21_094_D0	52953004	32750186	11274151	10355943	MIXED
PQRC21_072_D0	62871984	19006266	10805971	10038904	MIXED
PQRC21_143_D0	73538743	32988706	9856949	9080929	MIXED
PQRC21_091_D0	59818498	5050513	2828727	2623463	MIXED
PQRC21_109_D0	54869654	5061496	2016356	1845433	MIXED
PQRC21_102_D0	74460166	5056256	1844590	1720465	MIXED
PQRC21_161_D0	81094059	46303211	26323791	24471601	NONDEL
PQRC21_099_D0	47657562	25523414	16409313	15327548	NONDEL
PQRC21_140_D0	73218493	25518949	14642770	13610967	NONDEL
PQRC21_055_D0	75458644	27879987	13733646	12904729	NONDEL
PQRC21_137_D0	66153004	25636925	13492960	12657284	NONDEL
PQRC21_084_D0	77255092	18372940	12092601	11354301	NONDEL
PQRC21_139_D0	71301501	19716771	11543362	10814518	NONDEL
PQRC21_053_D0	67001995	23016161	11426189	10567858	NONDEL
PQRC21_119_D0	78757748	17794028	11189118	10427107	NONDEL
PQRC21_064_D0	52321888	17776087	11147515	10420064	NONDEL
PQRC21_089_D0	64719014	20906880	9505380	8917007	NONDEL
PQRC21_029_D0	66369999	17578723	9442583	8844019	NONDEL
PQRC21_056_D0	48300890	17895290	7441163	6971801	NONDEL
PQRC21_085_D0	64439307	12315442	7096142	6560145	NONDEL
PQRC21_093_D0	71927909	12750836	7006229	6632688	NONDEL
PQRC21_080_D0	73384989	6050265	3449212	3209056	NONDEL
PQRC21_075_D0	71390876	2751476	1575105	1464521	NONDEL
PQRC21_076_D0	63907451	2731388	1409956	1304084	NONDEL
PQRC21_077_D0	81432607	9071829	5451681	5145542	NONDEL
PQRC21_127_D0	67313551	28997463	16700657	15635448	no WGS classification
PQRC21_125_D0	62182922	24140798	15933573	14604579	no WGS classification
PQRC21_146_D0	72147391	26861510	15344867	14157106	no WGS classification
PQRC21_152_D0	53875483	22428492	13395564	12388104	no WGS classification
PQRC21_128_D0	77690063	25174767	13328348	12532783	no WGS classification
PQRC21_110_D0	70590019	20493738	11577242	10755919	no WGS classification
PQRC21_134_D0	73846118	20283175	11513822	10733537	no WGS classification
PQRC21_153_D0	64343577	20320218	10955169	10137791	no WGS classification
PQRC21_151_D0	62307155	16937339	10474246	9732864	no WGS classification
PQRC21_111_D0	58796138	16348039	9526011	8913972	no WGS classification
PQRC21_157_D0	82137789	18091934	8952628	8319055	no WGS classification
PQRC21_122_D0	63972211	21032337	8937025	8330582	no WGS classification
PQRC21_155_D0	62760860	13709347	8546837	7921759	no WGS classification
PQRC21_123_D0	73502793	16727277	8539647	8001254	no WGS classification
PQRC21_150_D0	74699451	13631500	8359261	7833041	no WGS classification
PQRC21_024_D0	75349139	12799272	8271115	7722355	no WGS classification
PQRC21_149_D0	73797776	12541233	7620608	7043591	no WGS classification
PQRC21_126_D0	59810988	12196167	6733134	6201210	no WGS classification
PQRC21_132_D0	62465001	13008919	6096927	5605230	no WGS classification
PQRC21_124_D0	61359565	9821786	5945353	5557545	no WGS classification
PQRC21_130_D0	81746615	11682200	5069382	4779464	no WGS classification
PQRC21_158_D0	66527580	8357533	4928627	4594024	no WGS classification
PQRC21_135_D0	53879047	7657114	4461954	4126639	no WGS classification
PQRC21_133_D0	63418008	7014799	4106223	3769375	no WGS classification
PQRC21_156_D0	60820566	6645558	3817953	3528474	no WGS classification
PQRC21_147_D0	63916501	16992433	3306599	2973727	no WGS classification
PQRC21_136_D0	61823639	5868640	3240209	3032263	no WGS classification
PQRC21_131_D0	67525538	4922922	2662120	2501520	no WGS classification
PQRC21_148_D0	83491410	6110761	2055272	1936065	no WGS classification
PQRC21_129_D0	3932434	972531	782514	742525	no WGS classification
PQRC21_142_D0	88487049	1336543	489002	457418	low RNA-seq coverage
PQRC21_101_D0	74116304	605911	266457	247617	low RNA-seq coverage
PQRC21_095_D0	51531190	684448	163919	151825	low RNA-seq coverage
PQRC21_118_D0	86559271	183253	110393	101223	low RNA-seq coverage
PQRC21_141_D0	72859871	63663	43322	40141	low RNA-seq coverage
PQRC21_154_D0	67055879	40231	25405	21304	low RNA-seq coverage
PQRC21_105_D0	60453898	229203	24024	21041	low RNA-seq coverage
PQRC21_164_D0	61406916	29091	20074	17735	low RNA-seq coverage
PQRC21_092_D0	33236874	23393	3614	1377	low RNA-seq coverage
PQRC21_096_D0	64024913	3335	2225	1486	low RNA-seq coverage
PQRC21_082_D0	277	87	69	64	low RNA-seq coverage
PQRC21_004_D0	54969228	16418836	10448421	9855091	low WGS coverage
PQRC21_145_D0	71433506	1057181	541409	506240	low WGS coverage

## Sheet: Table S4
Window with indication of deletion	No of isolates	Closest gene					Window with indication of duplication	No of isolates	Closest gene
PvP01_01_v2_9444	90	Plasmodium exported protein, pseudogene					PvP01_02_v2_7582	52	PIR protein
PvP01_01_v2_9454	90	Plasmodium exported protein, pseudogene					PvP01_02_v2_8773	67	PIR protein
PvP01_02_v2_8769	54	PIR protein					PvP01_02_v2_8810	58	PIR protein
PvP01_02_v2_8803	67	PIR protein					PvP01_02_v2_8779	55	PIR protein
PvP01_02_v2_8818	63	PIR protein					PvP01_02_v2_8812	56	PIR protein
PvP01_04_v2_6920	57	serine-repeat antigen 4 (SERA)					PvP01_04_v2_6927	60	serine-repeat antigen 4 (SERA)
PvP01_04_v2_6984	63	serine-repeat antigen 3 (SERA)					PvP01_04_v2_7079	74	serine-repeat antigen 5 (SERA)
PvP01_04_v2_7081	56	serine-repeat antigen 5 (SERA)					PvP01_04_v2_7182	146	serine-repeat antigen 4 (SERA), pseudogene
PvP01_04_v2_7135	58	serine-repeat antigen 4 (SERA)					PvP01_04_v2_7183	90	serine-repeat antigen 4 (SERA), pseudogene
PvP01_04_v2_7180	74	serine-repeat antigen 4 (SERA), pseudogene					PvP01_04_v2_7184	78	serine-repeat antigen 4 (SERA), pseudogene
PvP01_04_v2_7181	126	serine-repeat antigen 4 (SERA), pseudogene					PvP01_04_v2_7264	93	serine-repeat antigen 5 (SERA)
PvP01_04_v2_7182	114	serine-repeat antigen 4 (SERA), pseudogene					PvP01_04_v2_7265	128	serine-repeat antigen 5 (SERA)
PvP01_04_v2_7265	105	serine-repeat antigen 5 (SERA)					PvP01_04_v2_7266	116	serine-repeat antigen 5 (SERA)
PvP01_04_v2_7266	150	serine-repeat antigen 5 (SERA)					PvP01_04_v2_7271	79	serine-repeat antigen 5 (SERA)
PvP01_04_v2_7267	61	serine-repeat antigen 5 (SERA)					PvP01_05_v2_114	69	PIR protein
PvP01_04_v2_7268	67	serine-repeat antigen 5 (SERA)					PvP01_05_v2_10146	81	Plasmodium exported protein (PHIST)
PvP01_04_v2_7325	59	serine-repeat antigen (SERA)					PvP01_05_v2_14478	86	PIR protein
PvP01_05_v2_10111	53	Plasmodium exported protein (PHIST)					PvP01_05_v2_14479	124	PIR protein
PvP01_05_v2_10174	60	Plasmodium exported protein (PHIST)					PvP01_05_v2_14494	91	PIR protein, pseudogene
PvP01_05_v2_114	58	PIR protein					PvP01_05_v2_14513	72	PIR protein, pseudogene
PvP01_05_v2_14510	63	PIR protein					PvP01_05_v2_15035	82	PIR protein, pseudogene
PvP01_05_v2_14494	79	PIR protein, pseudogene					PvP01_05_v2_15036	142	PIR protein, pseudogene
PvP01_05_v2_14496	85	PIR protein, pseudogene					PvP01_05_v2_15052	70	PIR protein, pseudogene
PvP01_05_v2_14497	107	PIR protein, pseudogene					PvP01_05_v2_15070	76	PIR protein
PvP01_05_v2_14514	53	PIR protein, pseudogene					PvP01_05_v2_6529	108	Plasmodium exported protein (PHIST)
PvP01_05_v2_15054	64	PIR protein, pseudogene					PvP01_05_v2_6553	97	Plasmodium exported protein (PHIST)
PvP01_05_v2_15056	104	PIR protein, pseudogene					PvP01_08_v2_16603	60	PIR protein
PvP01_05_v2_15057	76	PIR protein					PvP01_08_v2_16961	122	PIR protein
PvP01_05_v2_15069	58	PIR protein					PvP01_08_v2_17601	73	PIR protein
PvP01_05_v2_15070	55	PIR protein					PvP01_08_v2_17602	108	PIR protein
PvP01_05_v2_6529	120	Plasmodium exported protein (PHIST)					PvP01_09_v2_21569	58	tryptophan-rich protein
PvP01_05_v2_6554	61	Plasmodium exported protein (PHIST)					PvP01_09_v2_21570	70	tryptophan-rich protein
PvP01_05_v2_6555	79	Plasmodium exported protein (PHIST)					PvP01_09_v2_21650	63	tryptophan-rich protein
PvP01_08_v2_16547	52	PIR protein					PvP01_09_v2_21861	126	PIR protein
PvP01_08_v2_16946	62	PIR protein					PvP01_09_v2_21862	123	PIR protein
PvP01_08_v2_17600	54	PIR protein					PvP01_09_v2_21868	75	PIR protein
PvP01_09_v2_21570	69	tryptophan-rich protein					PvP01_09_v2_21877	163	PIR protein
PvP01_09_v2_21652	70	tryptophan-rich protein					PvP01_09_v2_21878	141	PIR protein
PvP01_09_v2_21853	67	PIR protein					PvP01_09_v2_22000	62	PIR protein
PvP01_09_v2_21861	52	PIR protein					PvP01_09_v2_22008	62	PIR protein
PvP01_09_v2_21862	135	PIR protein					PvP01_09_v2_22001	131	PIR protein
PvP01_09_v2_21995	73	PIR protein					PvP01_09_v2_22002	92	PIR protein
PvP01_09_v2_21996	64	PIR protein					PvP01_09_v2_22016	128	PIR protein
PvP01_09_v2_22003	52	PIR protein					PvP01_09_v2_22017	169	PIR protein
PvP01_09_v2_22004	115	PIR protein					PvP01_10_v2_13402	59	MSP3.9
PvP01_10_v2_4776	65	multidrug resistance protein 1					PvP01_10_v2_13495	58	MSP3.5
PvP01_10_v2_4777	150	multidrug resistance protein 1					PvP01_10_v2_13407	62	MSP3.9
PvP01_10_v2_4778	62	multidrug resistance protein 1					PvP01_10_v2_13489	60	MSP3.5
PvP01_10_v2_4787	155	multidrug resistance protein 1					PvP01_12_v2_7995	52	MSP7-like protein
PvP01_10_v2_4788	69	multidrug resistance protein 1					PvP01_12_v2_8002	55	MSP7-like protein
PvP01_12_v2_8002	146	MSP7-like protein					PvP01_12_v2_8003	54	MSP7-like protein
PvP01_12_v2_8003	124	MSP7-like protein					PvP01_12_v2_8017	117	MSP7-like protein
PvP01_12_v2_8026	147	MSP7-like protein					PvP01_12_v2_8018	127	MSP7-like protein
PvP01_12_v2_8027	69	MSP7-like protein					PvP01_12_v2_8023	78	MSP7-like protein
PvP01_12_v2_8025	71	MSP7-like protein					PvP01_12_v2_8026	71	MSP7-like protein
PvP01_12_v2_8047	68	MSP7.6					PvP01_12_v2_8048	76	MSP7.6
PvP01_12_v2_8048	127	MSP7.6					PvP01_12_v2_8049	52	MSP7.6
PvP01_12_v2_8049	73	MSP7.6					PvP01_12_v2_8051	70	MSP7.6
PvP01_12_v2_8050	83	MSP7.6					PvP01_12_v2_8052	54	MSP7.6
PvP01_12_v2_8091	69	MSP7E					PvP01_12_v2_8091	102	MSP7E
PvP01_12_v2_8092	88	MSP7E					PvP01_12_v2_8123	71	MSP7-like protein
PvP01_12_v2_8157	153	MSP7-like protein					PvP01_12_v2_8124	139	MSP7.9
PvP01_12_v2_8158	130	MSP7-like protein					PvP01_12_v2_8125	68	MSP7.9
PvP01_14_v2_31161	69	PIR protein					PvP01_12_v2_8154	93	MSP7-like protein
PvP01_14_v2_31201	60	PIR protein					PvP01_12_v2_8157	83	MSP7-like protein
PvP01_14_v2_31202	91	PIR protein					PvP01_14_v2_0	159	Plasmodium exported protein
PvP01_14_v2_31334	79	PIR protein					PvP01_14_v2_1	178	Plasmodium exported protein
PvP01_14_v2_31352	67	PIR protein					PvP01_14_v2_2	72	Plasmodium exported protein
PvP01_14_v2_351	55	Plasmodium exported protein					PvP01_14_v2_31176	83	PIR protein
							PvP01_14_v2_31207	60	PIR protein
							PvP01_14_v2_351	96	Plasmodium exported protein
							PvP01_14_v2_352	186	Plasmodium exported protein
							PvP01_14_v2_353	56	Plasmodium exported protein

## Sheet: Table S5
			mdr1 locus genotype frequencies
Continent	Country	No of Samples	Del 478-479 kbp	Dupl 468-506 kbp	Dupl 474-475 kbp	Dupl 475-479 kbp	Dupl 484-489 kbp	Dupl 482-482 kbp	Del 478-479 kbp, Dupl 468-506 kbp	Del, Dupl 472-483 kbp	Del, Dupl 468-506 kbp, Dupl 472-479 kbp
Asia	Cambodia	169	0.72	0	0	0	0	0	0	0	0
	Thailand	120	0.3	0.075	0	0	0	0	0.0833	0.00833	0.0083
	Vietnam	100	0.67	0	0	0	0	0	0	0	0
	Malaysia	58	0	0	0	0	0	0	0	0	0
	Afghanistan	35	0	0	0	0	0	0	0	0	0
	Indonesia	15	0	0	0	0	0	0	0	0	0
	Myanmar	8	0.375	0	0.125	0	0	0.125	0	0	0
	Bangladesh	6	0	0	0	0	0	0	0	0	0
	Iran	5	0	0	0	0	0	0	0	0	0
	India	4	0	0	0	0	0	0	0	0	0
	China	4	0	0	0	0	0	0	0	0	0
	Phillipines	3	0	0	0	0	0	0	0	0	0
	Bhutan	2	0	0	0	0	0	0	0	0	0
	Sri Lanka	1	0	0	0	0	0	0	0	0	0
South America	Colombia	65	0.0308	0	0	0	0	0	0	0	0
	Peru	48	0	0	0	0.0208	0	0	0	0	0
	Mexico	20	0	0	0	0	0	0	0	0	0
	Brazil	19	0	0.0526	0	0	0	0	0	0	0
	Nicaragua	1	0	0	0	0	0	0	0	0	0
	Panama	1	0	0	0	0	0	0	0	0	0
Africa	Ethiopia	116	0	0	0	0	0	0	0	0	0
	Sudan	4	0	0	0	0	0	0	0	0	0
	Madagascar	4	0	0	0	0	0	0	0	0	0
	Mauritania	1	0	0	0	0	0	0	0	0	0
Australia	Papua New Guinea	17	0	0	0	0	0.0588	0	0	0	0
